# Supplementary material for: The impact of GPS and high-resolution radiosonde nudging on thesimulation of heavy precipitation during HyMeX IOP6
Source: Copernicus journal article supplement (doi:10.5194/wcd-2021-2), 2021-01-18
Supplement: Supplementary file 1 [file wcd-2021-2-supplement.pdf]

# The impact of GPS and high-resolution radiosonde nudging on the simulation of heavy precipitation during HyMeX IOP6

Alberto Caldas-Alvarez<sup>1</sup>, Samiro Khodayar<sup>1,2</sup> and Peter Knippertz<sup>1</sup>

<sup>1</sup>Institute of Meteorology and Climate Research (IMK-TRO), Karlsruhe Institute of Technology, Karlsruhe, P.O. Box 3640, 76021, Germany

<sup>2</sup>Mediterranean Centre for Environmental Studies (CEAM), Valencia, 46980, Spain

Correspondence to Alberto Caldas-Alvarez (alberto.caldas-alvarez@kit.edu)

## 12 Supplementary Material (SM)

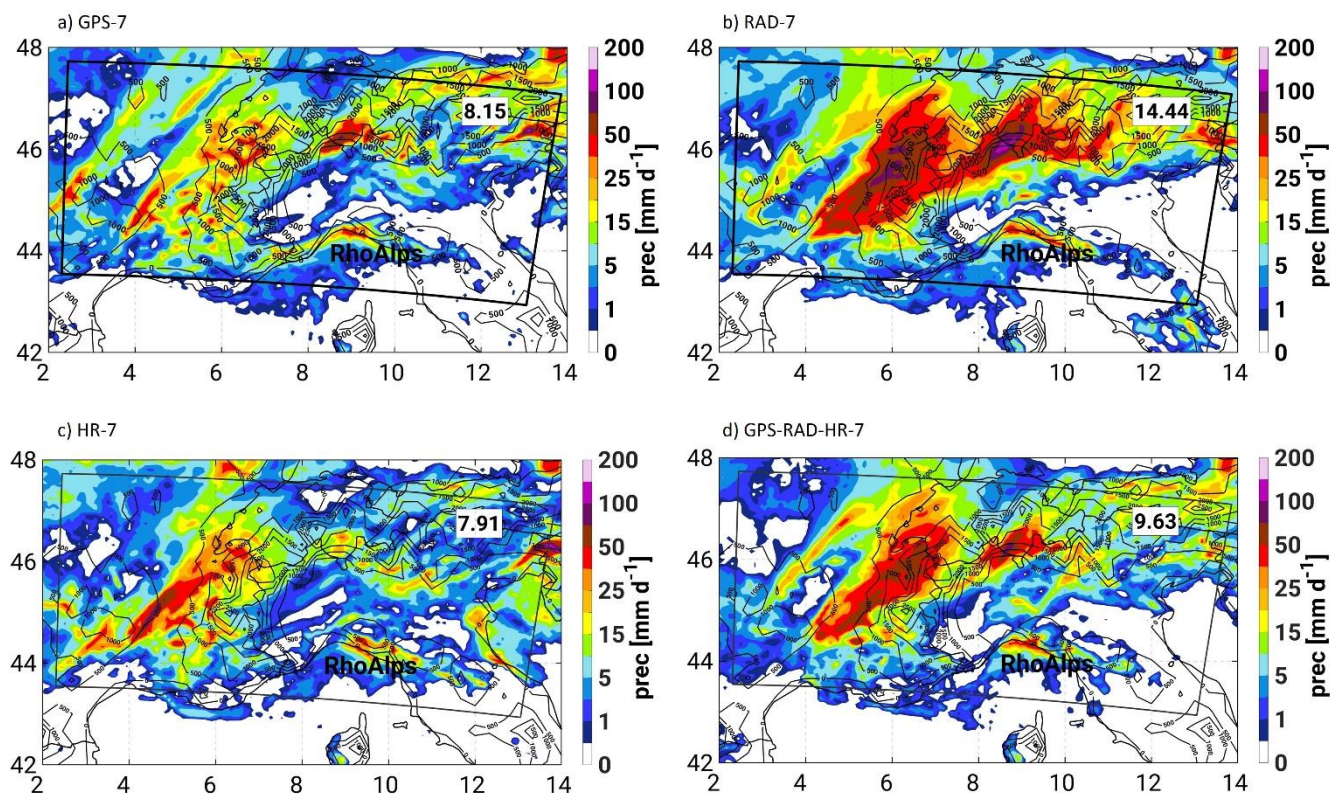

10 Figure S1: As Fig. 4 in the main paper but for the 7 km simulations.

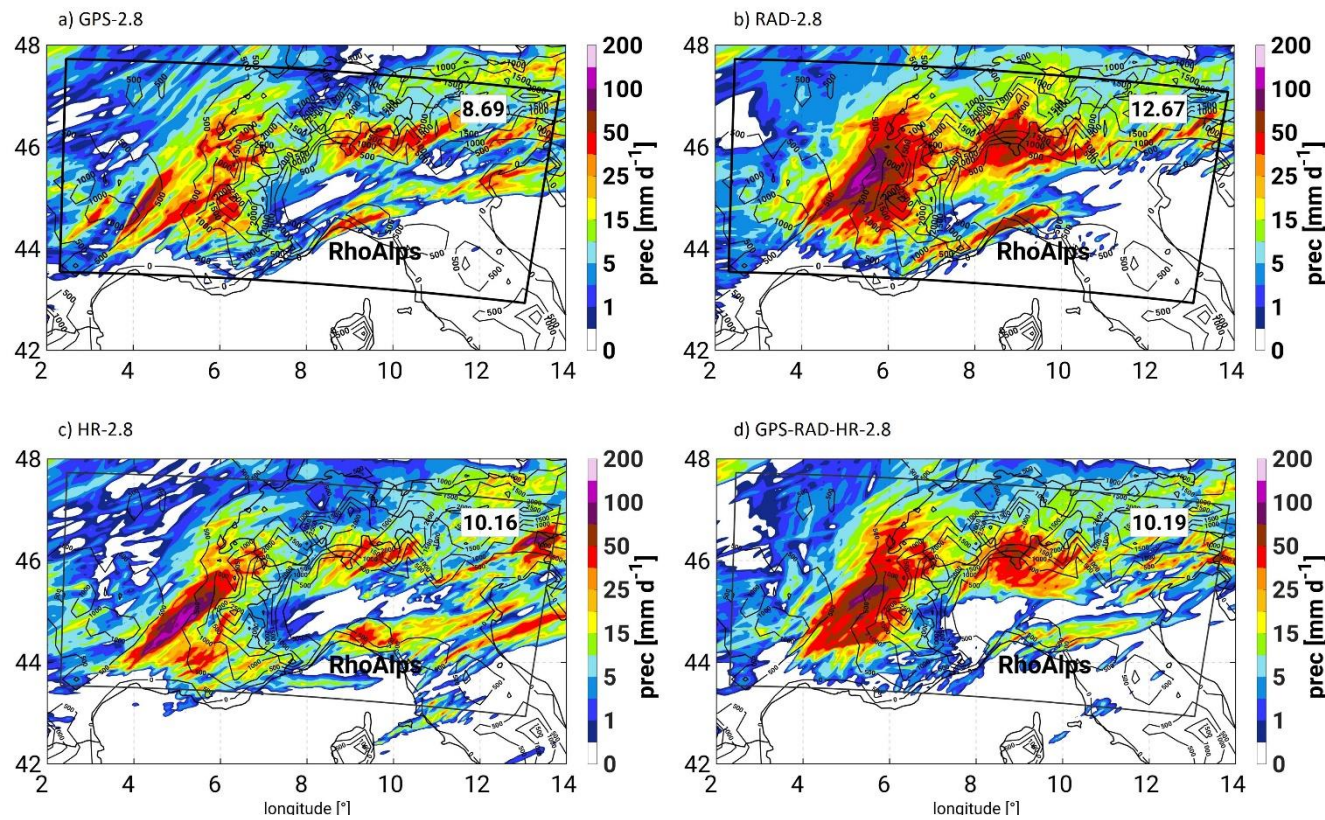

20 Figure S2: As Fig. 4 in the main paper but for the 2.8 km simulations.

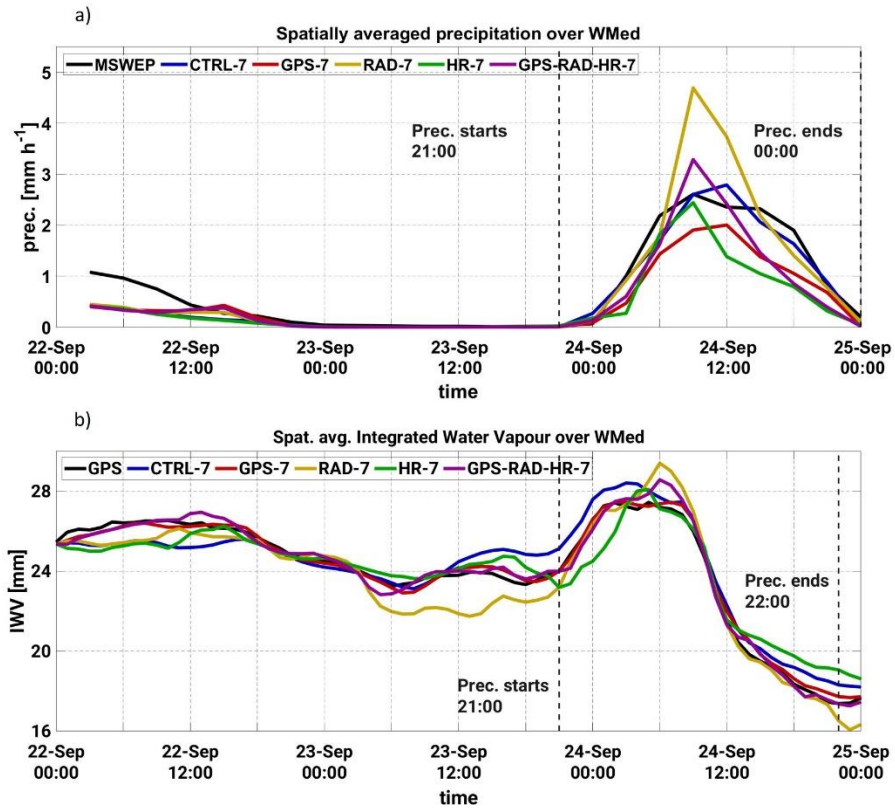

**Figure S3: Temporal evolution of spatially averaged precipitation (a) and IWV at the location of the GPS stations (b) over investigation area (RhoAlps). As Fig 6.a and 7 respectively in the main paper but for the 7 km simulations.**



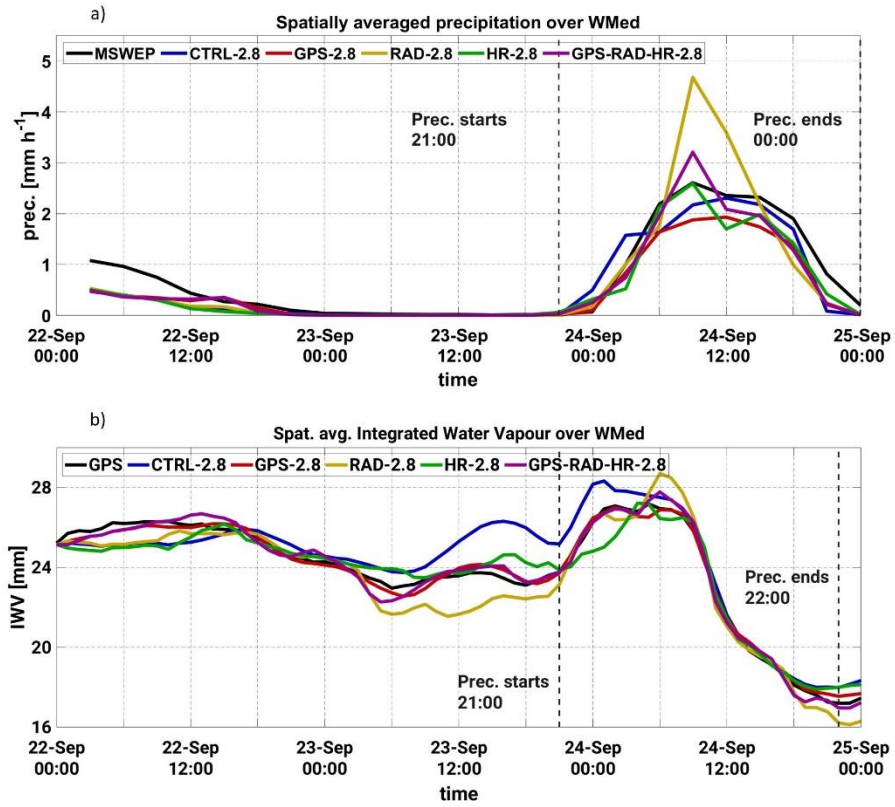

Figure S4: Temporal evolution of spatially averaged precipitation (a) and IWV at the location of the GPS stations (b) over investigation area (RhoAlps). As Fig 6.a and 7 respectively in the main paper but for the 2.8 km simulations.

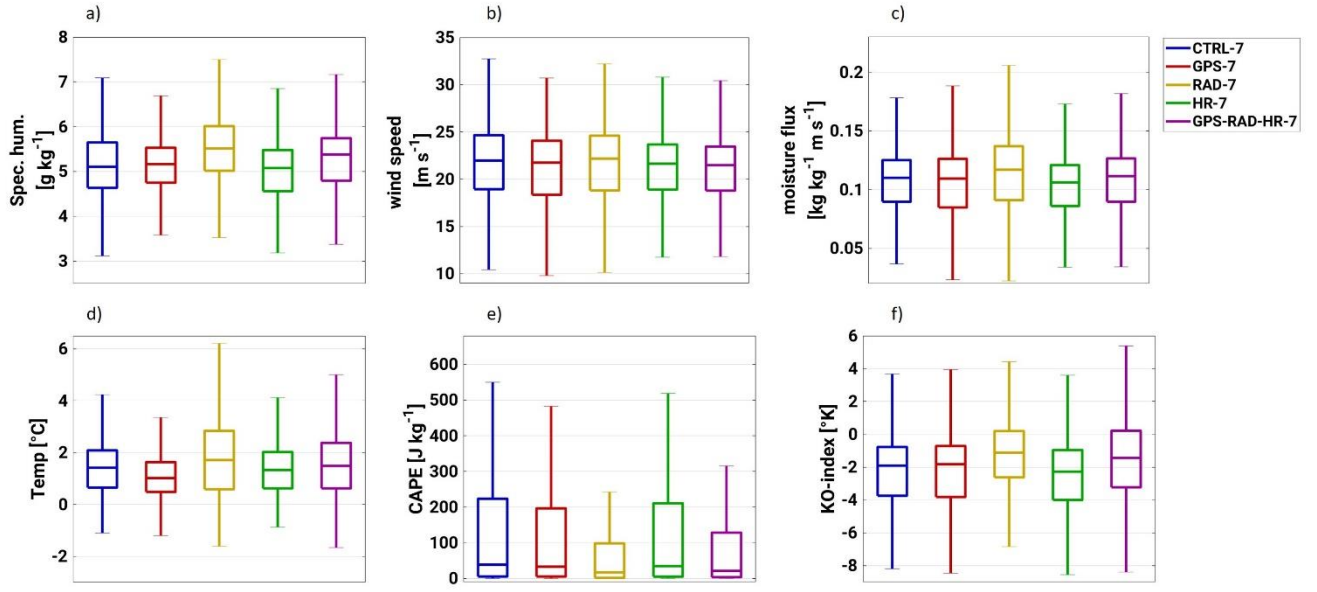

Figure S5: As Fig. 9 in the main paper but for the 7 km simulations.

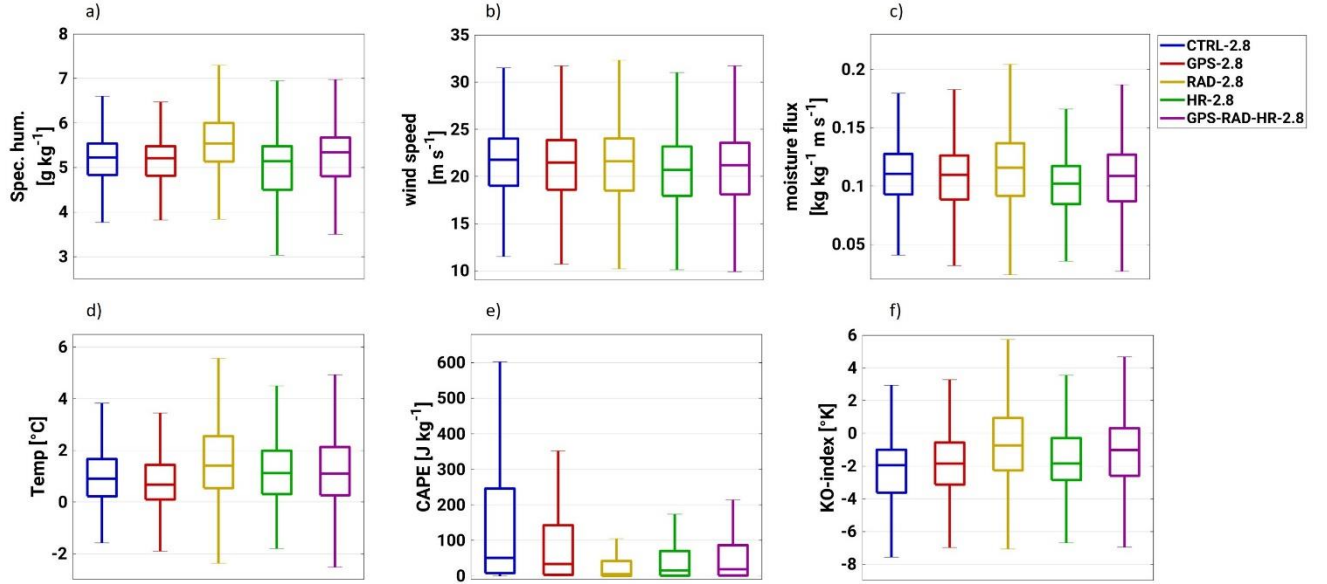

Figure S6: As Fig. 9 in the main paper but for the 2.8 km simulations.
