# Supplementary material for: The impact of GPS and high-resolution radiosonde nudging on thesimulation of heavy precipitation during HyMeX IOP6
Source: Copernicus journal article supplement (doi:10.5194/wcd-2021-2), 2021-01-18
Supplement: Supplementary file [file wcd-2021-2-RC1-supplement.pdf]

| Model configurations: |          |      |         |           |
|-----------------------|----------|------|---------|-----------|
| Resolution            | Forcing  | Lev. | Convec. | Turb.     |
| 7 km                  | IFS      | 40   | Tiedtke | 1D        |
|                       |          |      | Deep    | TKE       |
| 2.8 km                | CTRL-7   | 50   | Tiedtke | 1D        |
|                       |          |      | Shallow | TKE       |
| 500m                  | CTRL-2.8 | 80   | -       | 3D<br>TKE |

| Assimilation configurations: |                         |         |
|------------------------------|-------------------------|---------|
| Observations                 | Freq.                   | Levels  |
| RAD (Oper. Rads.)            | ~ 6 h                   | ~20     |
| HR (High-res. Rads.)         | ~6 h                    | ~4000   |
| GPS                          | 10<br>min               | Integr. |
| GPS-RAD                      | Combined<br>instruments |         |
| RAD-HR                       |                         |         |
| GPS-RAD-HR                   |                         |         |
| CTRL (No obs.)               |                         |         |
